# Supplementary material for: High-Content Screening of a Taiwanese Indigenous Plant Extract Library Identifies Syzygium simile leaf Extract as an Inhibitor of Fatty Acid Uptake
Source: MDPI journal article supplement (doi:10.3390/ijms19072130), 2018-07-22
Supplement: s1 [file s1]

# Supplementary Materials: High-Content Screening of a Taiwanese Indigenous Plant Extract Library Identifies *Syzygium simile* leaf Extract as an Inhibitor of Fatty Acid Uptake

Chia-Hung Yen, Hsun-Shuo Chang, Tsai-Hsun Yang, Sheng-Fan Wang, Ho-Cheng Wu, Yu-Chang Chen, Kai-Jay Lin, Sheena Wang

Table S1. Number of taxa of Taiwan indigenous plant extract library by major plant group.

| Classification | N (%)        |
|----------------|--------------|
| Ferns          | 140 (10.5)   |
| Gymnosperm     | 12 (0.9)     |
| Dicotyledons   | 1,103 (82.5) |
| Monocotyledons | 81 (6.1)     |

Table S2. Skeleton classification of compounds isolated from *Syzygium* genus.

| Skeleton                   | Number | Skeleton                | Number |
|----------------------------|--------|-------------------------|--------|
| Flavonoids                 | 58     | Aromatic hydroxyketones | 4      |
| Galloyl glucoses           | 24     | Phenylpropanoids        | 4      |
| Triterpenoids              | 24     | Megastigmanes           | 3      |
| Phloroglucinol derivatives | 11     | Alkaloids               | 3      |
| Chalcones                  | 10     | Chromones               | 3      |
| Steroids                   | 10     | Alkanes                 | 2      |
| Lignans                    | 9      | Monoterpenoids          | 2      |
| Benzenoids                 | 8      | Neolignan               | 1      |
| Gallic acids               | 7      | Isoflavonoid            | 1      |
| Phenol glucoside gallates  | 7      | Diterpenoid             | 1      |

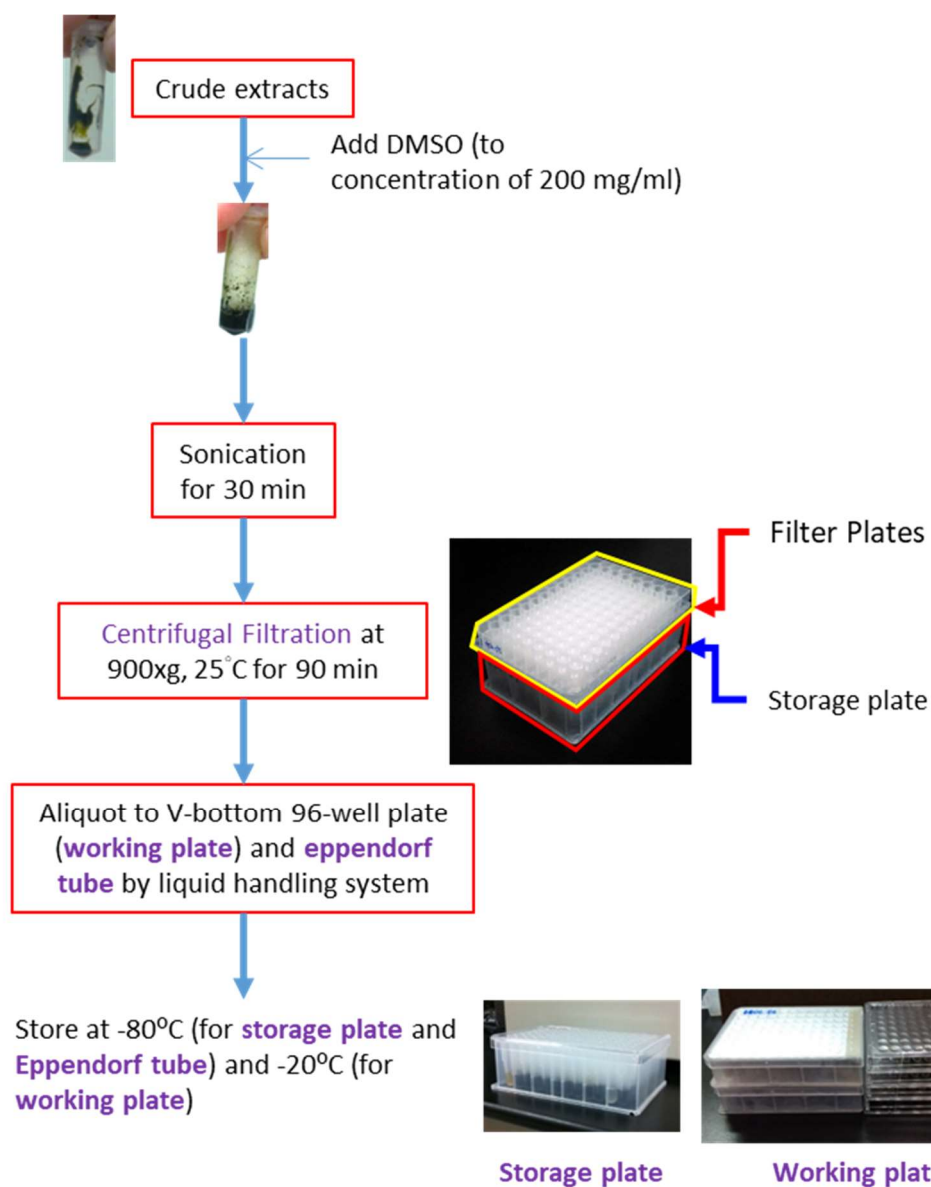

**Figure S1.** Flowchart of library construction. The dried crude extracts were dissolved in DMSO at the concentration of 200 mg/mL, sonicated for 30 min at 25 °C, and then the unsolvable residuals were removed by centrifuge filtration with the MultiScreen® Solvinert Filter Plate (0.45 µm PTFE membrane). The flow-through (dissolved extract) were collected in 96-Well MASTERBLOCK® plate. The extracts were then transferred into V-bottom 96-well plate and Eppendorf tube by a liquid handling system. The storage and working plates were sealed with foil and stored at -80 and -20 °C, respectively. After screening hit extracts in the Eppendorf tube aliquot will be used in further validating experiments.

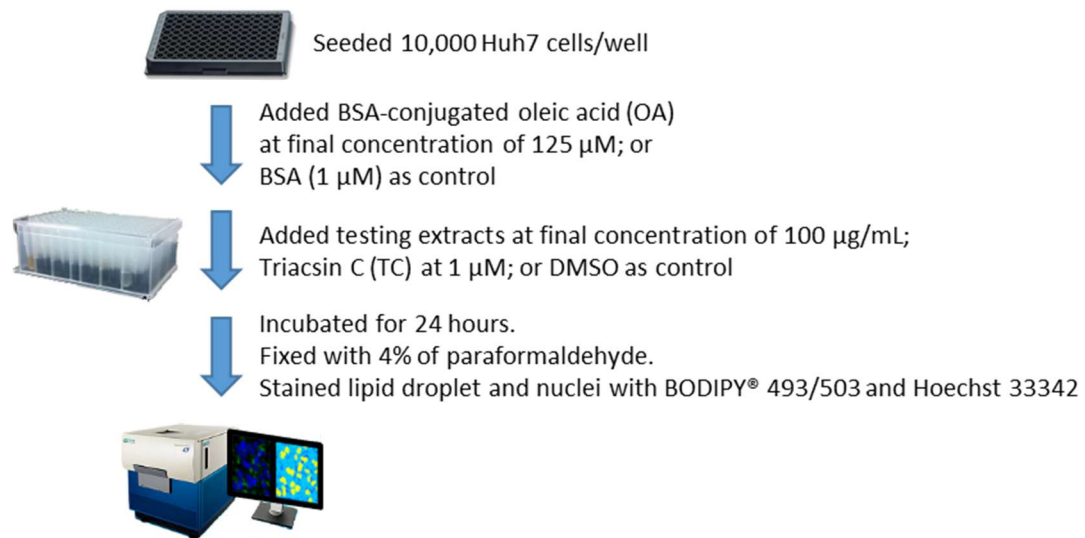

4 Images/well were acquired and analyzed by ImageXpress Micro XLS system

Hit criteria for primary screening:

1. inhibit LD accumulation (both counts and area) > 40%
2. cell count > 60% of average cell count

**141** hits were identified

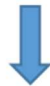

Secondary screening

Extract concentration: 100  $\mu$ g/mL

Hit criteria:

1. inhibit LD accumulation > 50%
2. cell count > 60% of average cell count

**20** hits were identified

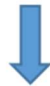

Validation

Hit criteria:

1. inhibit LD accumulation in concentration dependent manner
2. inhibit LD accumulation > 50% at 50  $\mu$ g/mL

**3** hits were identified

**Figure S2.** Flowchart of screening.

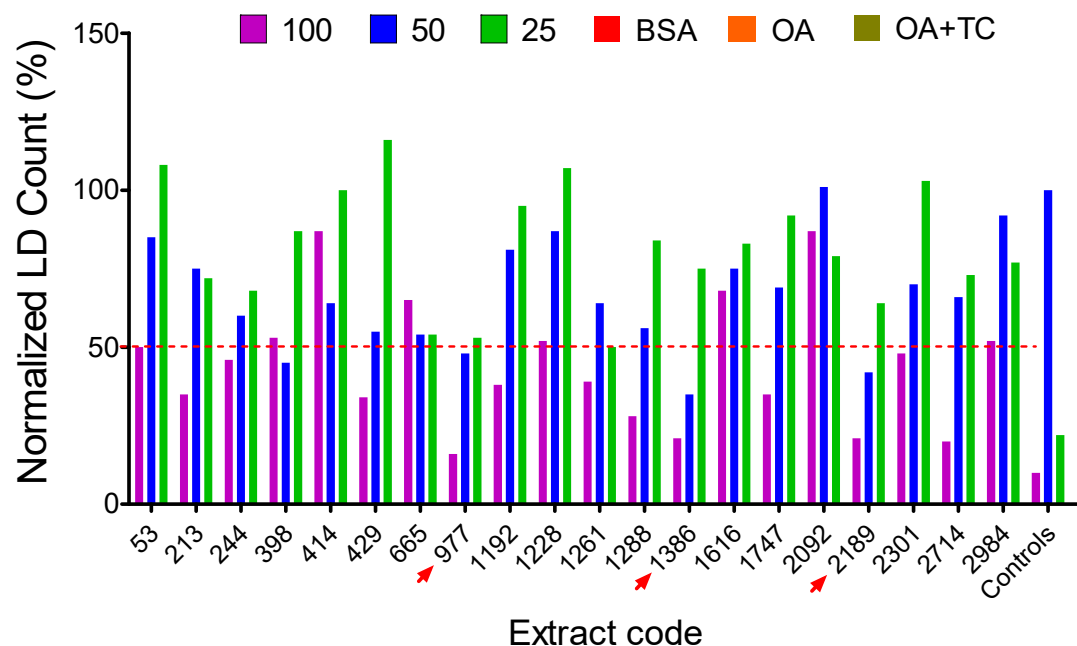

**Figure S3.** Results of Validation experiment. Huh7 cells were treated with BSA or 125  $\mu$ M OA in the absence or presence of SSLE at 25, 50, and 100  $\mu$ g/mL or 1  $\mu$ M TC. After 24 h, LD counts were determined as described in Materials and Methods section. Extracts that reduced LD content in concentration-dependent manner and more than 50% (below red dash line) at 50  $\mu$ g/mL were considered as the final hits for HTS (indicated by red arrow). Extract code no.977 is the methanolic extract prepared from the leaves of *Syzygium simile* (SSLE).

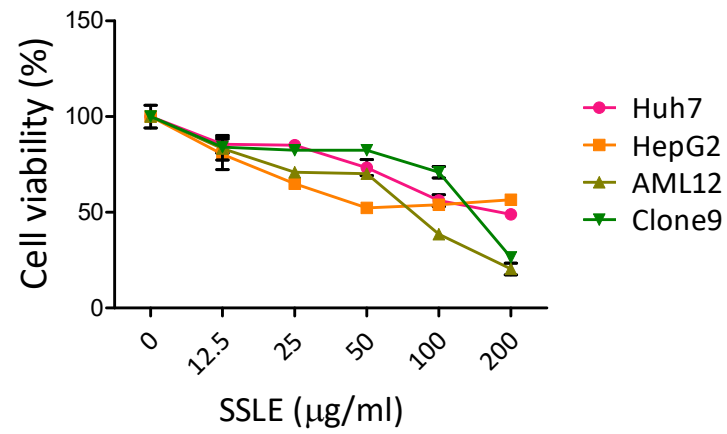

**Figure S4.** The cytotoxicity of SSLE in 4 hepatic cell lines. Liver cell lines from human (Huh7 and HepG2), mouse (AML12) and rat (Clone9) were used to test the cytotoxicity of SSLE. Cells were treated with a series concentration of SSLE for 72 h. Cell viability was measured by alamarBlue® reagent according to the manufacturer's protocol. The results were used to calculate half concentration for cell cytotoxicity (CC<sub>50</sub>) of SSLE by using GraphPad Prism 5.01 software.

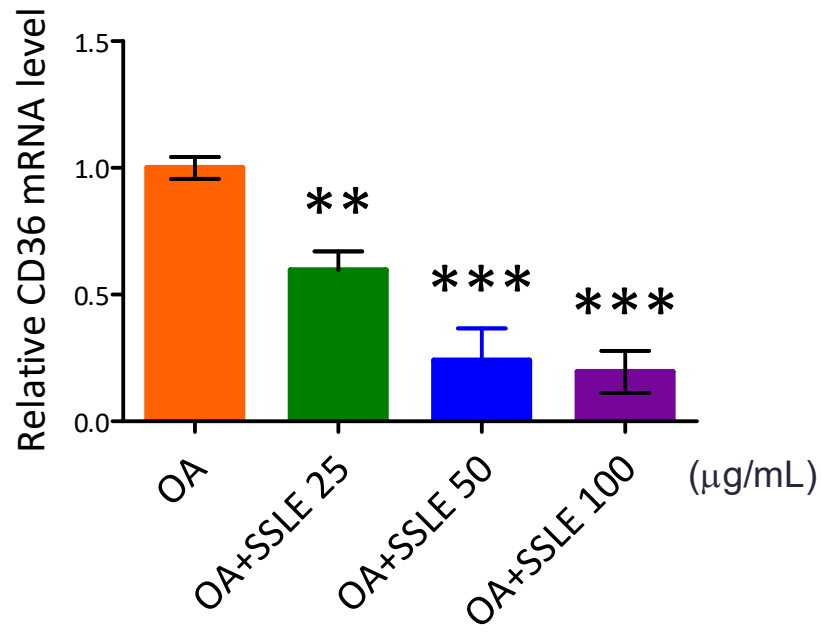

**Figure S5.** Dose-dependent repression of CD36 mRNA expression by SSLE. Huh7 cells were treated with 125  $\mu$ M OA in the presence or absence of SSLE at indicated concentrations for 12 h. RT-qPCR was used to determine the expression CD36 gene.

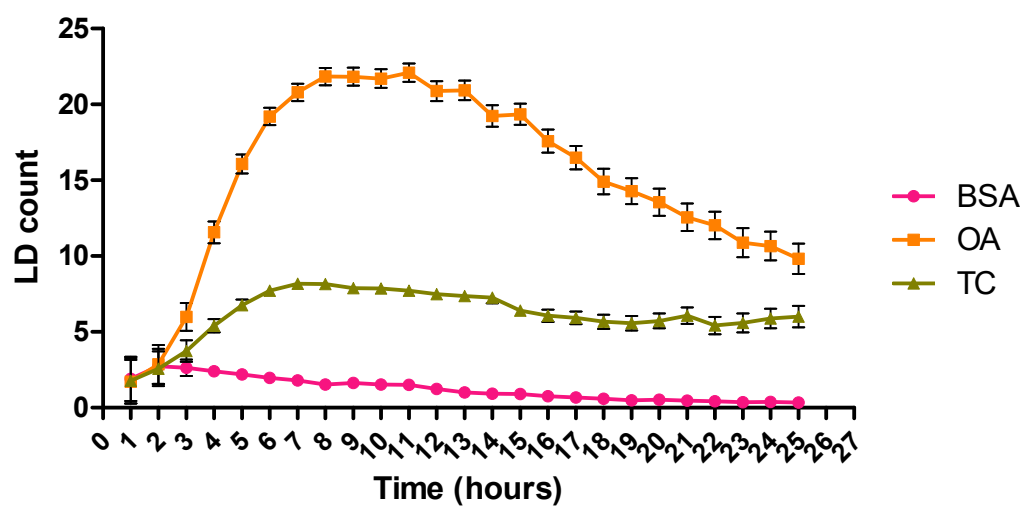

**Figure S6.** Kinetics of LD formation. Huh7 cells seeded in 96-well plate were treated as indicated in the presence of staining reagents. Then the time-lapse images of living cells were acquired once an hour for 25 h by ImageXpress Micro System automatically. The original videos were shown in Video S1–S3.

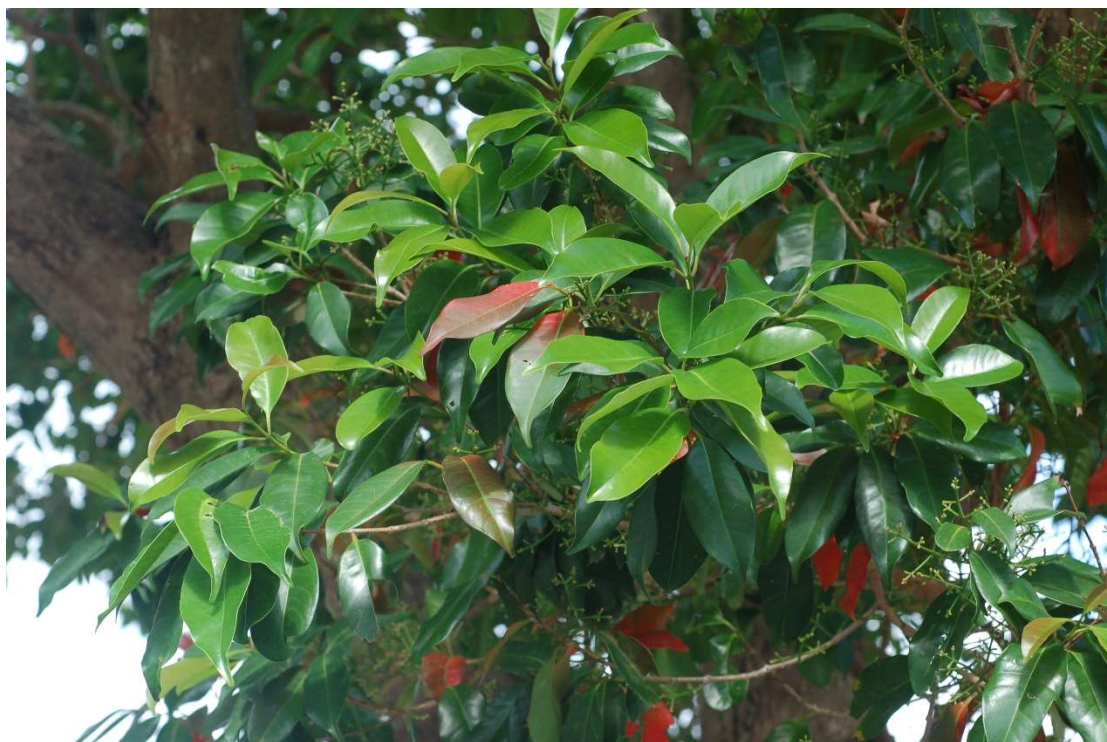

**Figure S7.** Picture of *Syzygium simile*.
