# Supplementary material for: High-Content Screening of a Taiwanese Indigenous Plant Extract Library Identifies Syzygium simile leaf Extract as an Inhibitor of Fatty Acid Uptake
Source: Int J Mol Sci. 2018 Jul 22;19(7):2130. doi: 10.3390/ijms19072130 (PMC6073993; doi:10.3390/ijms19072130)
Supplement: Supplementary file 1 [file ijms-19-02130-s001.zip]

Archive with 4 entries (4 files):
- Supplementary.pdf
- Video 1. OA.avi
- Video 2. BSA.avi
- Video 3. OA plus TC.avi
